# Supplementary material for: Investigating Carvedilol’s Repurposing for the Treatment of Non-Small Cell Lung Cancer via Aldehyde Dehydrogenase Activity Modulation in the Presence of β-Adrenergic Agonists
Source: MDPI journal article supplement (doi:10.3390/cimb45100505), 2023-09-29
Supplement: s1 [file s1]

# Investigating Carvedilol's Repurposing for the Treatment of Non-Small Cell Lung Cancer via Aldehyde Dehydrogenase Activity Modulation in the Presence of $\beta$ -Adrenergic Agonists

Balqis A. Ikhmais <sup>1,\*</sup>, Alaa M. Hammad <sup>1</sup>, Osama H. Abusara <sup>1</sup>, Lama Hamadneh <sup>2</sup>, Hamza Abumansour <sup>1</sup>, Qasem M. Abdallah <sup>3</sup>, Ali I. M. Ibrahim <sup>1</sup>, Lina Elsalem <sup>4</sup>, Mariam Awad <sup>1</sup> and Rahaf Alshehada <sup>1</sup>

<sup>1</sup> Department of Pharmacy, Faculty of Pharmacy, Al-Zaytoonah University of Jordan, P.O. Box 130, Amman 11733, Jordan; alaa.hammad@zuj.edu.jo (A.M.H.); o.abusara@zuj.edu.jo (O.H.A.); h.abumansour@zuj.edu.jo (H.A.); a.ibrahim@zuj.edu.jo (A.I.M.I.); mariam7asan@hotmail.com (M.A.); rahafsaidghaith@gmail.com (R.A.)

<sup>2</sup> Department of Basic Medical Sciences, Faculty of Medicine, Al-Balqa Applied University, P.O. Box 206, Al-Salt 19117, Jordan; lama.hamadneh@bau.edu.jo

<sup>3</sup> Department of Pharmacology and Biomedical Sciences, Faculty of Pharmacy and Medical Sciences, University of Petra, P.O. Box 961343, Amman 1196, Jordan; qasem.abdallah@uop.edu.jo

<sup>4</sup> Department of Pharmacology, Faculty of Medicine, Jordan University of Science and Technology, P.O. Box 3030, Irbid 22110, Jordan; lmelsalem@just.edu.jo

\* Correspondence: b.ikhmais@zuj.edu.jo

## Supplementary Material

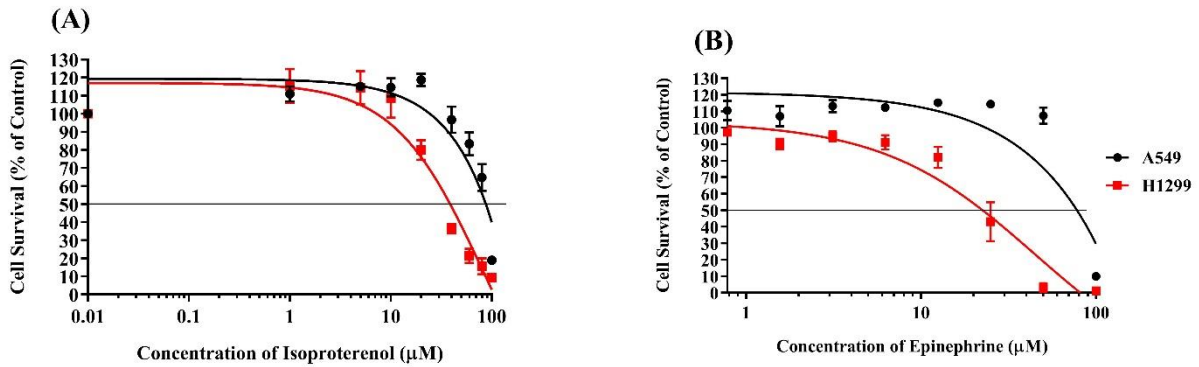

**Figure S1.** Dose-response curves for NSCLC cell lines; A549 and H1299 treated with  $\beta$ -agonists (A) isoproterenol and (B) epinephrine) as measured by the MTT assay. Treatment for 96 h;  $n = 3$ .

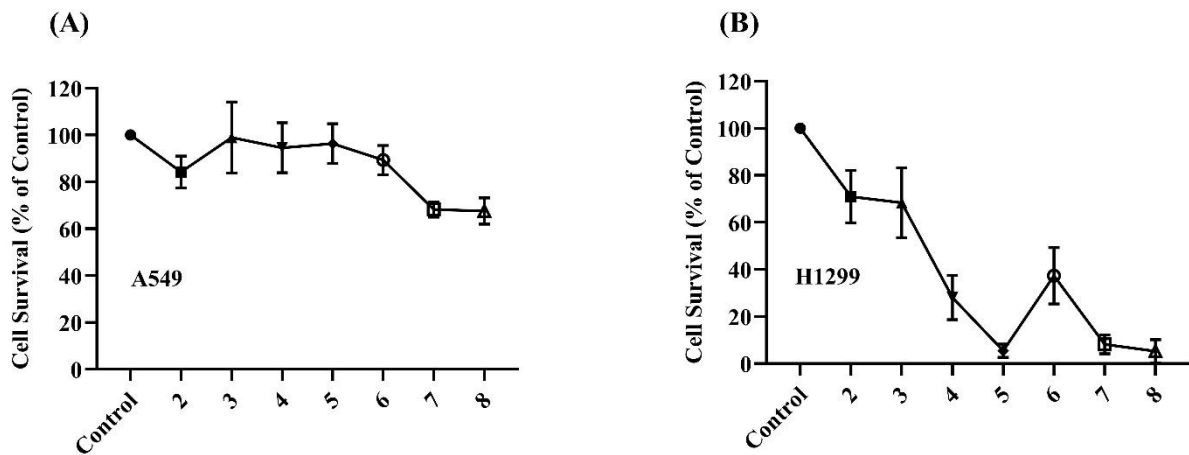

**Figure S2.** Cytotoxicity of different treatment conditions numbered as follow: 2, 3, 4, 5, 6, 7, and 8, which indicated A549 (curve (A)) and H1299 (curve (B)) cells treated with CAR at 10  $\mu\text{M}$ , ISO at 20, 40, and 60  $\mu\text{M}$  and CAR 10  $\mu\text{M}$  plus ISO 20, 40 and 60  $\mu\text{M}$  concentrations, respectively, as measured by MTT assay. Treatment for 96 h;  $n = 3$ .
